# Supplementary material for: Attack of the clones: whole genome-based characterization of two closely related enterohemorrhagic Escherichia coli O26 epidemic lineages
Source: PubMed Central journal article supplement (PMC6119250; doi:10.1186/s12864-018-5045-7), 2018-08-31
Supplement: 12864_2018_5045_MOESM2_ESM.pdf [file 12864_2018_5045_MOESM2_ESM.pdf]

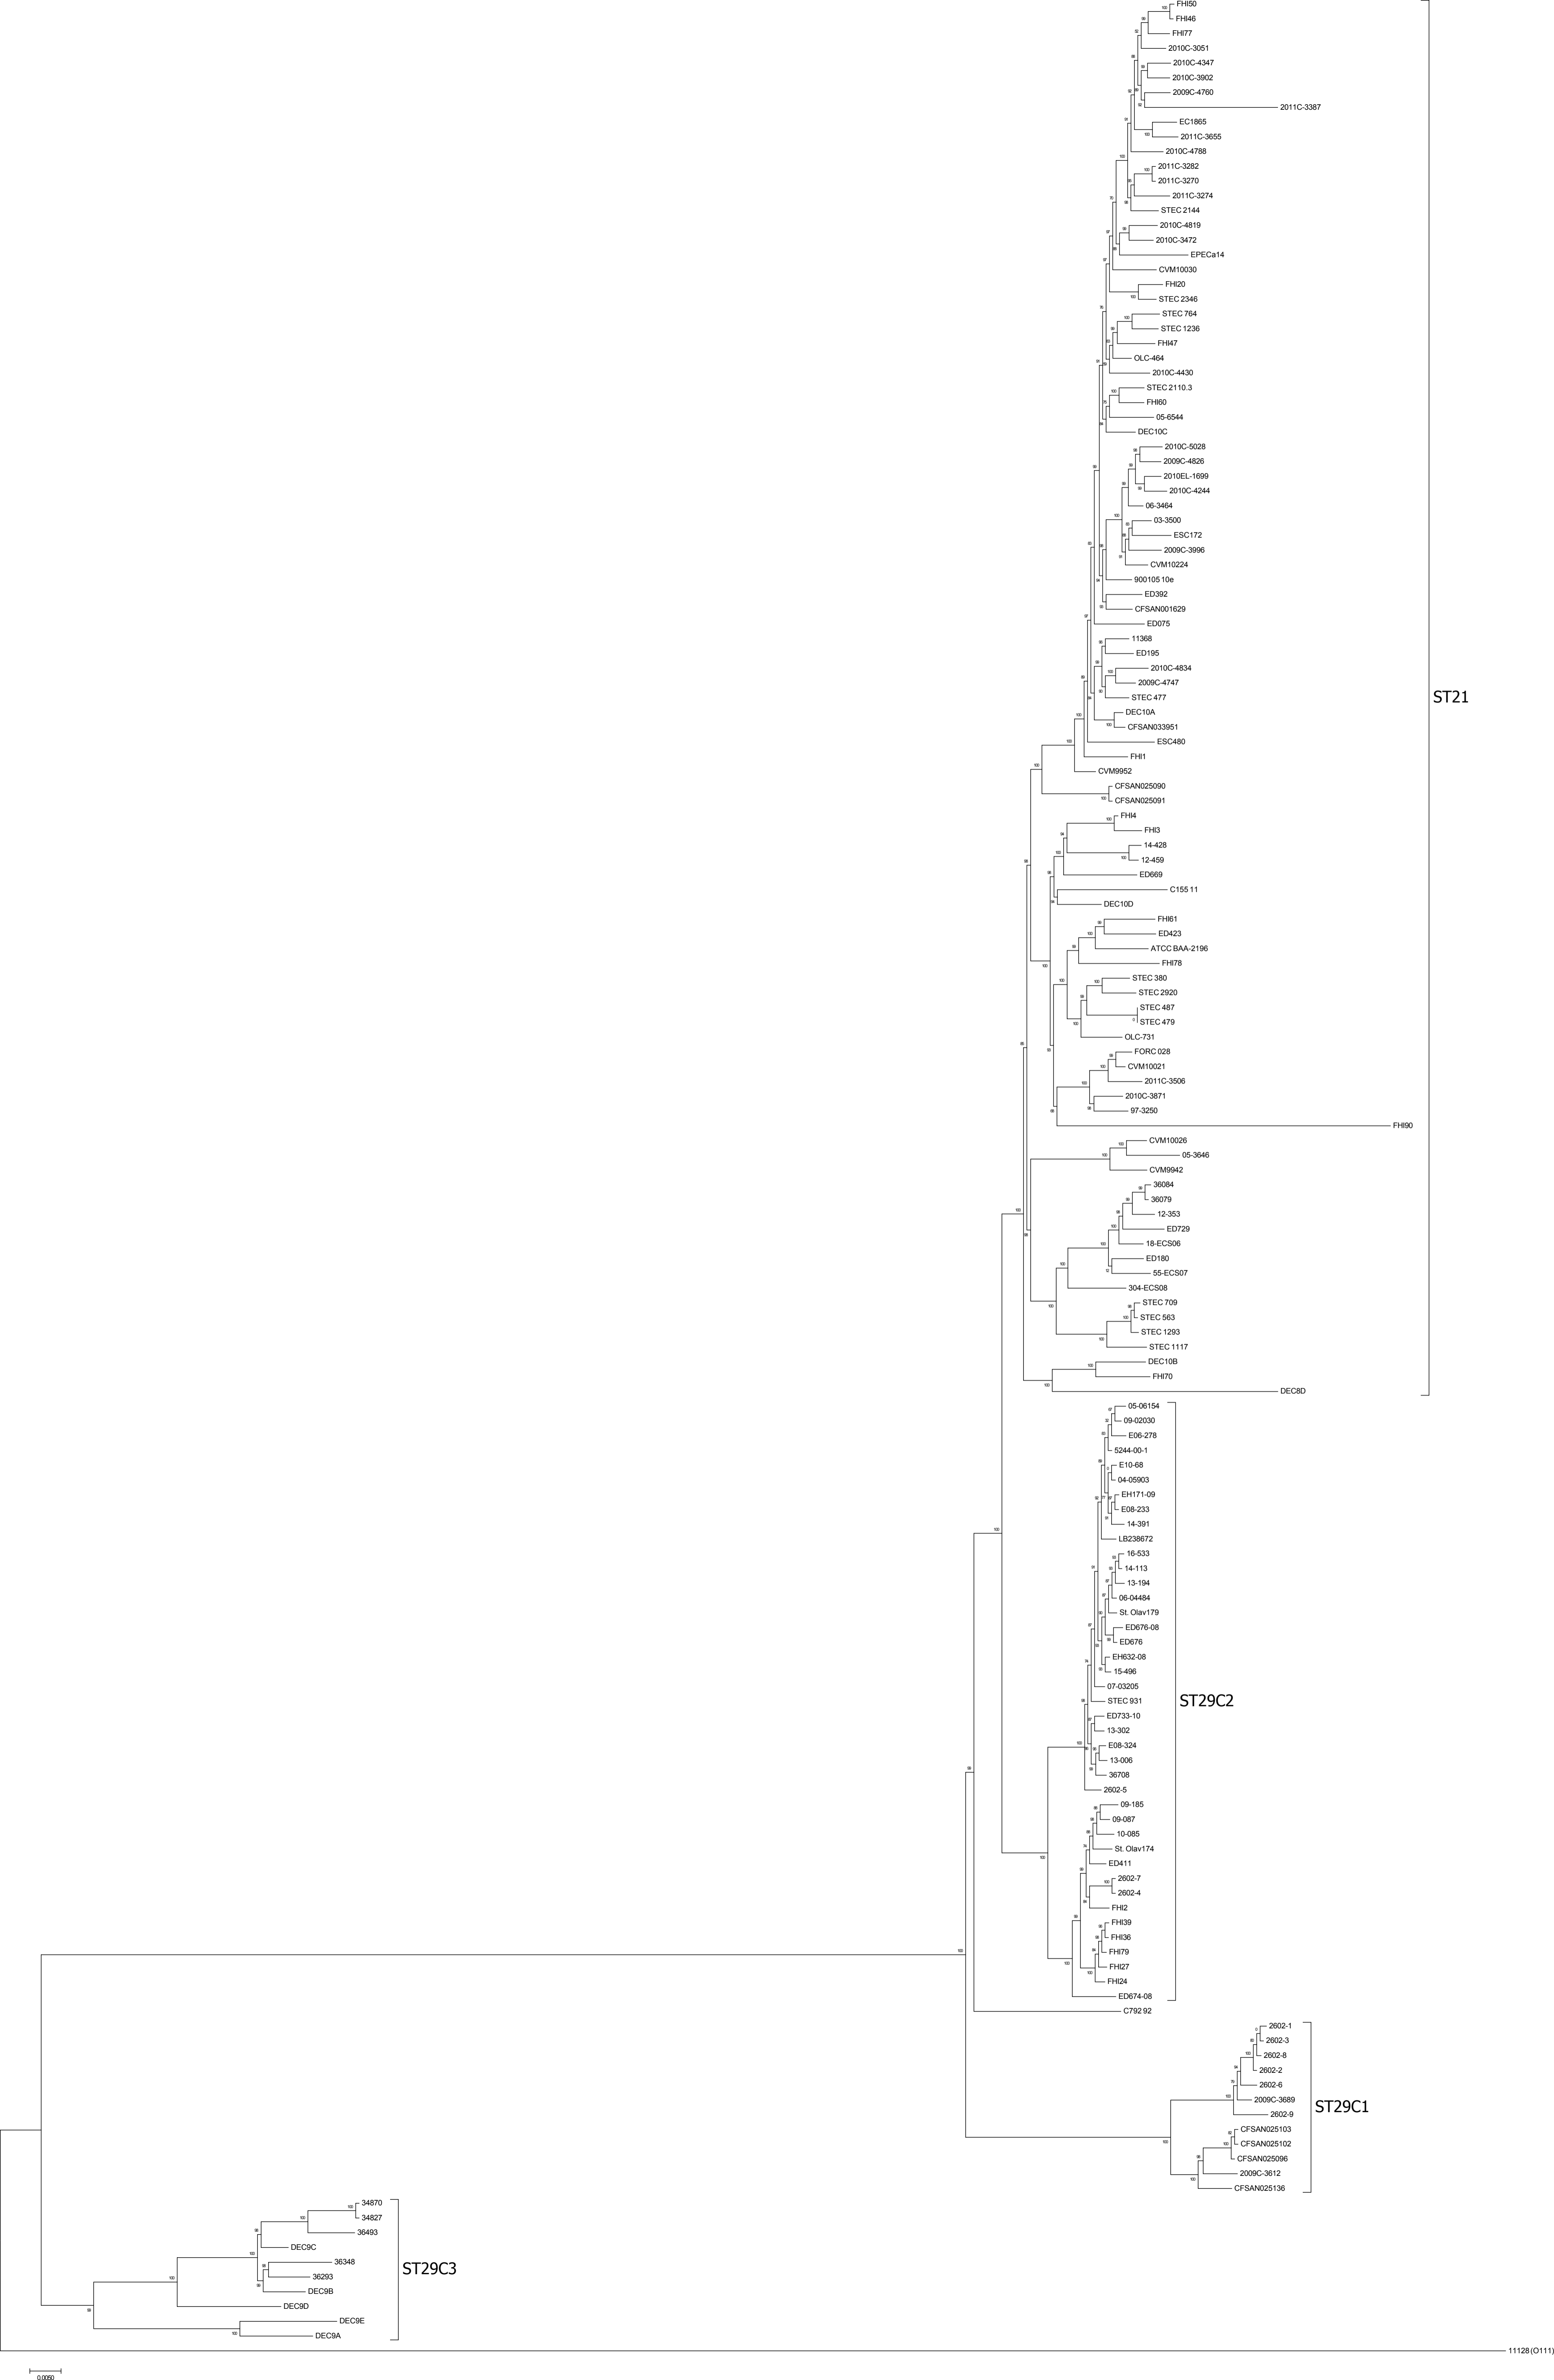

ST21

ST29C2

ST29C1

ST29C3
