# Supplementary material for: Attack of the clones: whole genome-based characterization of two closely related enterohemorrhagic Escherichia coli O26 epidemic lineages
Source: PubMed Central journal article supplement (PMC6119250; doi:10.1186/s12864-018-5045-7), 2018-08-31
Supplement: 12864_2018_5045_MOESM5_ESM.pdf [file 12864_2018_5045_MOESM5_ESM.pdf]

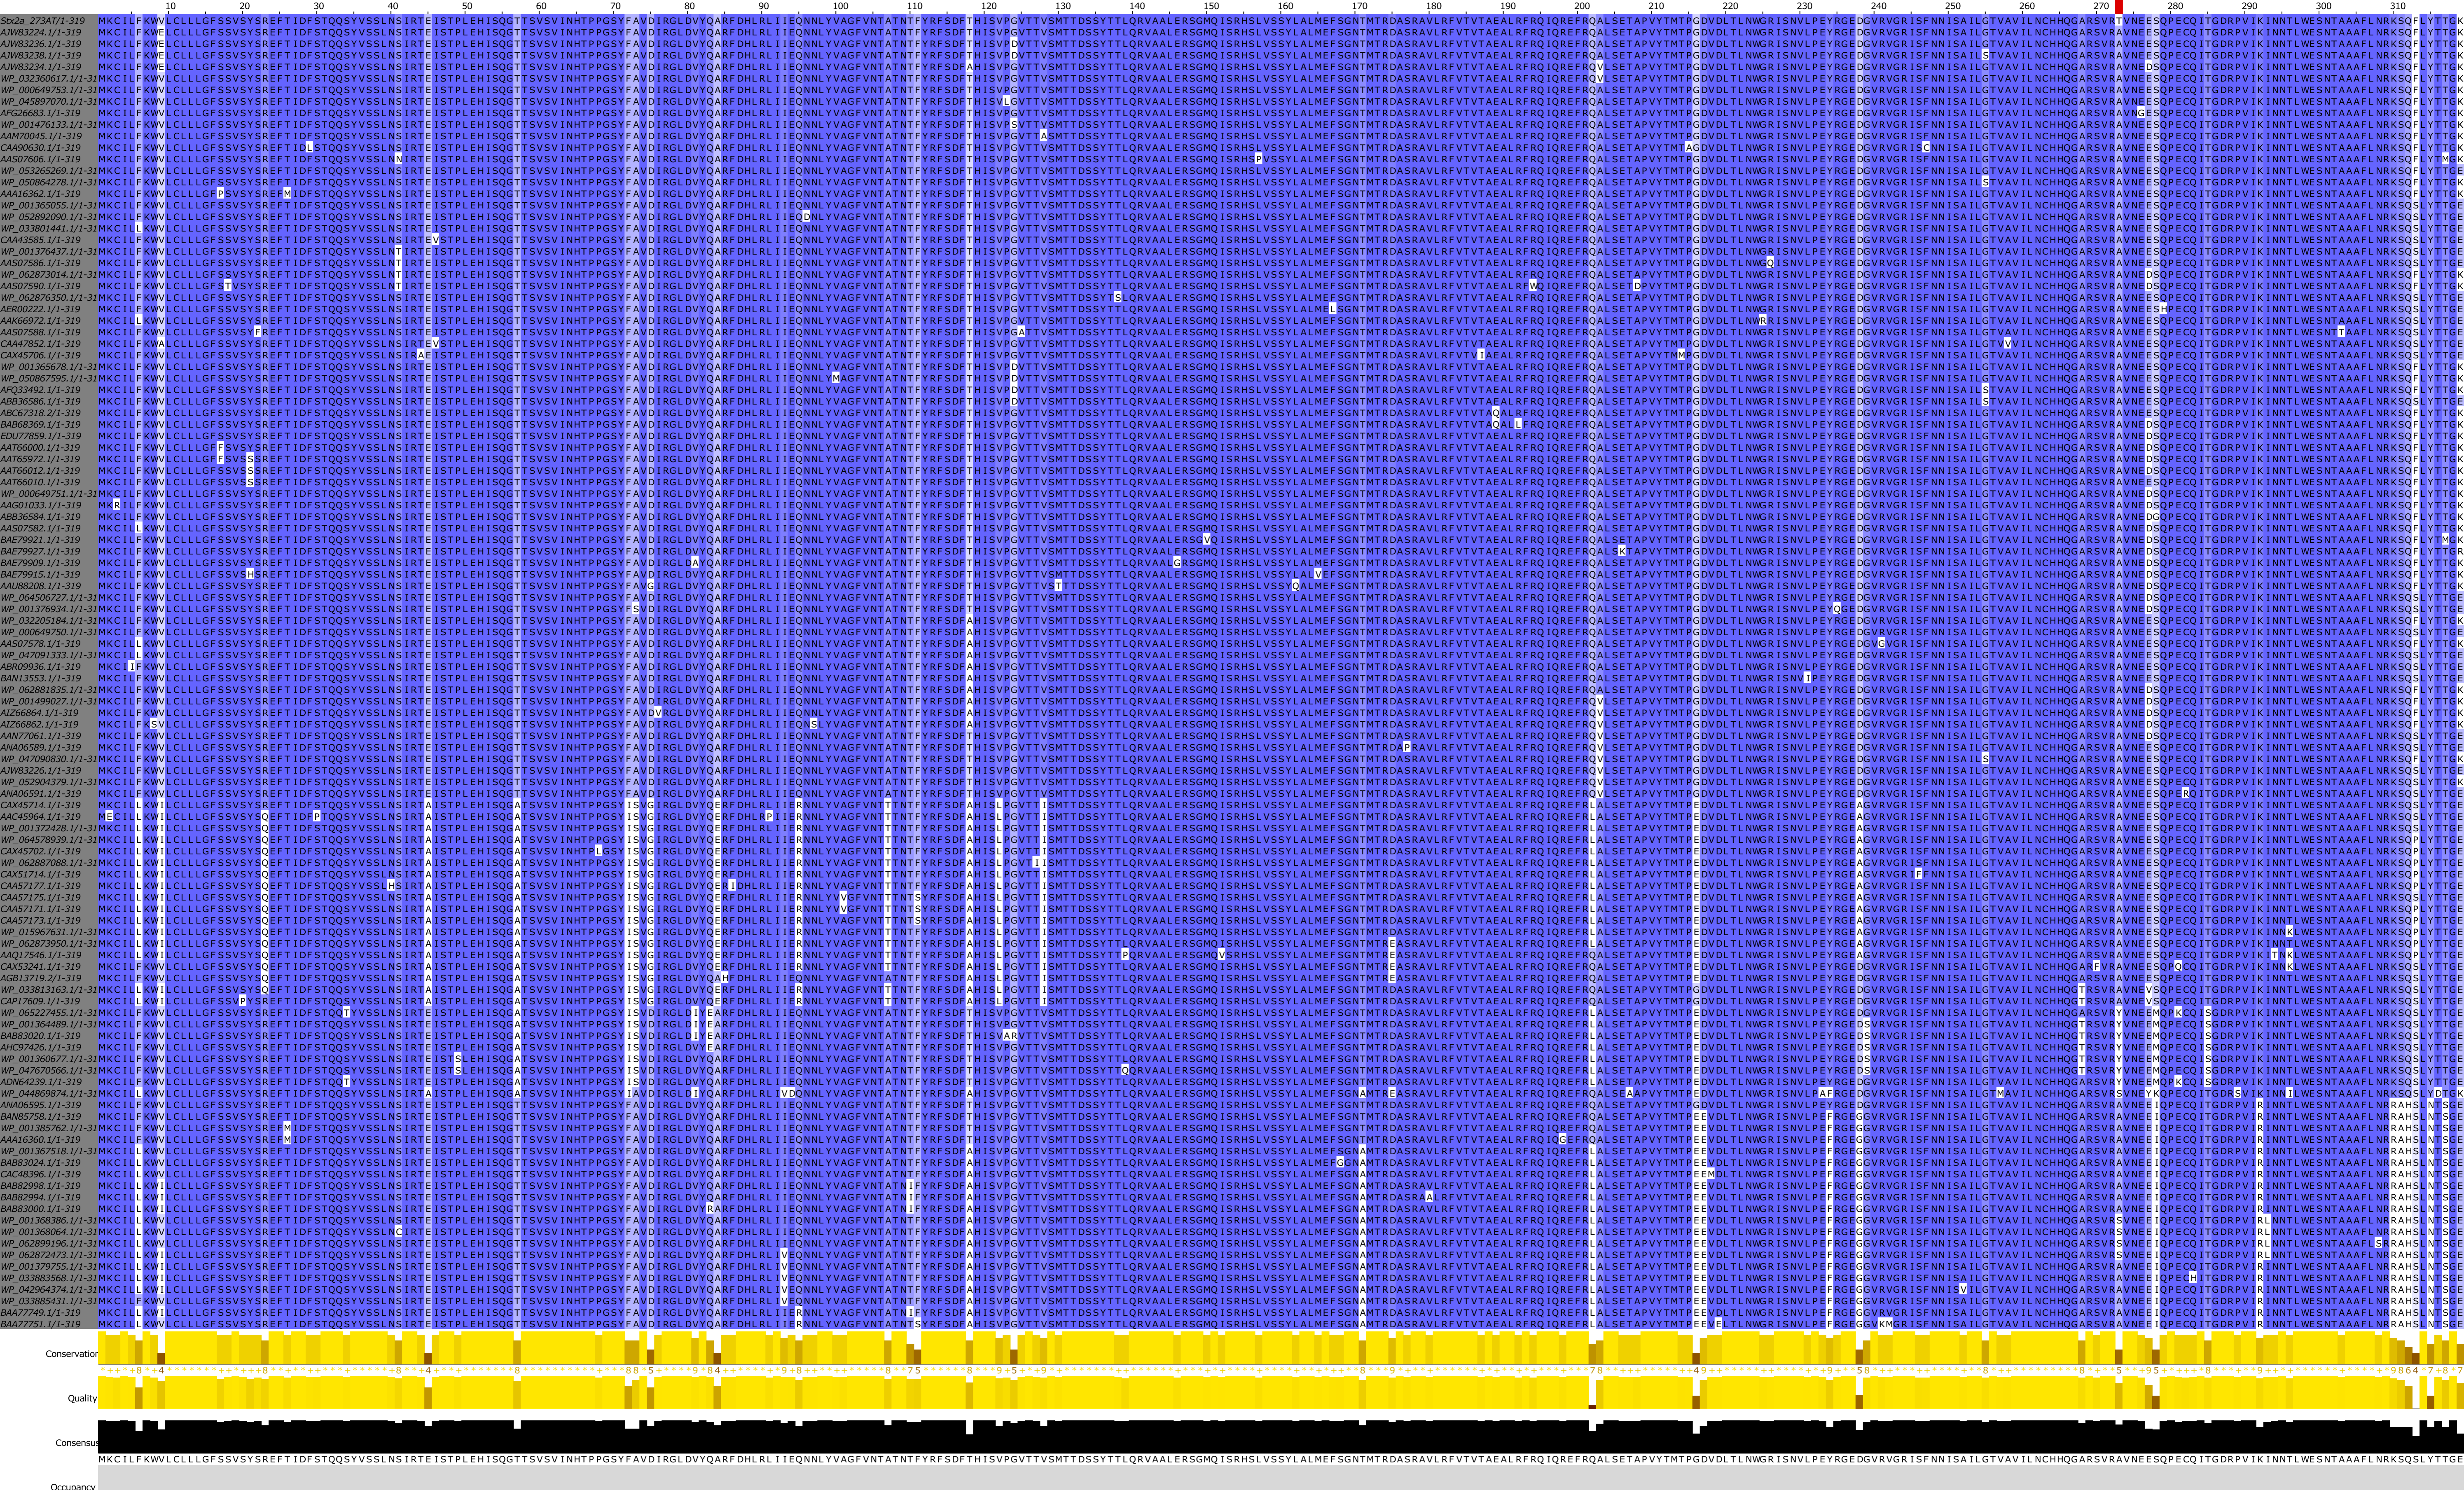

Conservator  
Quality  
Consensus  
Occupancy
